# Supplementary material for: STK33 Kinase Activity Is Nonessential in KRAS-Dependent Cancer Cells
Source: Oxford University Press journal article supplement (doi:10.1158/0008-5472.can-11-0778), 2011-07-08
Supplement: 00085472can110778-sup-stab_2_xls_file_-_175_k.xlsx [file 00085472can110778-sup-stab_2_xls_file_-_175_k.xlsx]

## Sheet: Sheet1
data show IC50s and individual curves from Figure 6E. Enzymatic IC50s and IC50s in cellular p-RPS6 assays are also shown for a direct comparison for each molecule
compound	enzyme IC50 (nM)	NB4 p-RPS6 IC50 (mM)	NB4 viability IC50 (mM)	NB4 viability curve	SKM-1 p-RPS6 IC50 (mM)	SKM-1 viability IC50 (mM)	SKM-1 viability curve
a	3	2.1	0.806		0.928	1.183
b	5	2	1.184		1.7	1.752
c	7	>10	1.086		0.168	1.125
d	8	>10	1.06		>10	1.022
e	10	n.d.	0.242		n.d.	0.177
f	10	3.5	0.228		2.6	0.205
g	19	0.795	0.558		>10	1.461
h	20	0.395	0.463		0.087	0.116
i	21	1.1	0.074		0.524	0.088
j	21	>10	0.313		>10	0.466
k	22	2.9	2.777		2.5	3.011
l	25	>10	0.607		>10	0.695
positive control compound			0.232			0.39938
