# Supplementary material for: STK33 Kinase Activity Is Nonessential in KRAS-Dependent Cancer Cells
Source: Oxford University Press journal article supplement (doi:10.1158/0008-5472.can-11-0778), 2011-07-08
Supplement: 00085472can110778-sup-stab_3_xls_file_3927k.xls [file 00085472can110778-sup-stab_3_xls_file_3927k.xls]

## Sheet: Sheet1
	IC50 curves for 515 individual compounds tested across 4 different assays. These data were used to create figure 5 of the manuscript
	compounds a-l of figure 6E are indicated in column B
	Compound	KRAS mutant				KRAS mutant				KRAS wild-type
		SKM-1 (p-RPS6 cell-based assay)				NB4 (p-RPS6 cell-based assay)				U-87 MG (p-RPS6 cell-based assay)				STK33 (enzmye-based assay)
	Compound ID	Curve	IC50 (M)	Flank	Max Activity	Curve	IC50 (M)	Flank	Max Activity	Curve	IC50 (M)	Flank	Max Activity	Curve	IC50 (M)	Flank	Max Activity
			1.27e-09	-	-97.74		3.03e-09	-	-98.43		2.31e-08	-	-83.71		3.81e-07	-	-92.69
			1.63e-09	-	-97.99		2.02e-09	-	-99.66		4.06e-08	-	-71.82		4.11e-07	-	-88.84
			1.87e-09	-	-99.18		5.18e-09	-	-98.72		2.59e-08	-	-84.18		3.83e-07	-	-89.56
			3.72e-09	-	-91.57		5.6e-09	-	-94.87		1.62e-07	-	-31.12		5.3e-07	-	-89.19
			3.86e-09	-	-98.35		6.51e-09	-	-98.97		4.54e-08	-	-77.17		9.39e-07	-	-87.07
			4e-09	-	-98.66		9.59e-09	-	-98.28		1.39e-07	-	-82.98		6.54e-07	-	-94.74
			4.19e-09	-	-91.08		1.02e-08	-	-96.27		-	-	-35.74		4.81e-07	-	-99.75
			7.74e-09	-	-79.34		1.46e-08	-	-87.08		3.99e-06	-	-45.75		4.93e-07	-	-99.52
			8.41e-09	-	-97.74		8.19e-08	-	-97.99		5.9e-06	-	-79.28		9.2e-08	-	-94.78
			1.46e-08	-	-95.2		-	-	-		5.84e-08	-	-50.77		-	-	-
			1.6e-08	-	-99.16		3.56e-08	-	-99.33		3.95e-07	-	-83.79		7.59e-08	-	-95.3
			1.83e-08	-	-77.65		2.09e-08	-	-91.9		1.99e-06	-	-40.35		2.6e-07	-	-80.36
			1.92e-08	-	-99.22		2.2e-08	-	-100		4.64e-07	-	-77.42		9.3e-08	-	-99.72
			2.03e-08	-	-98.61		4.33e-08	-	-99.01		1.09e-06	-	-81.78		3.94e-07	-	-83.65
			2.22e-08	-	-98.55		2.99e-08	-	-98.25		1.03e-07	-	-76.94		1.31e-07	-	-90.1
			2.25e-08	-	-99.72		3.02e-08	-	-99.22		4.13e-07	-	-85.72		8.25e-07	-	-89.91
			2.91e-08	-	-87.36		2.16e-08	-	-82.23		-	-	-17.66		5.8e-07	-	-84.49
			2.97e-08	-	-99.11		8.19e-08	-	-98.97		1.19e-06	-	-81.02		2.05e-07	-	-98.96
			3.54e-08	-	-92.44		1.45e-07	-	-98.28		2.89e-06	-	-72		1.3e-07	-	-97.23
			3.76e-08	-	-99.06		5.17e-08	-	-99.09		8.1e-07	-	-78.06		5.4e-07	-	-84.65
			3.91e-08	-	-91.72		4.98e-08	-	-94.86		-	-	-14.69		6.53e-07	-	-88.41
			4.3e-08	-	-98.35		8.32e-08	-	-98.49		1.1e-06	-	-77.03		7.89e-07	-	-83.8
			5.03e-08	-	-99.22		8.08e-08	-	-99.88		1.64e-06	-	-72.85		1.24e-07	-	-84.27
			5.47e-08	-	-48.87		3.72e-07	-	-77.02		-	-	-19.45		7.16e-08	-	-89.72
			5.58e-08	-	-97.6		6.03e-08	-	-99.53		-	4.269e-06	-75.12		1.26e-07	-	-101.1
			6.04e-08	-	-73.55		-	3.576e-07	-70.54		-	-	-17.31		8.37e-08	-	-94.96
			6.17e-08	-	-90.51		1.8e-08	-	-95.1		-	-	-28.07		6.35e-09	-	-85.78
			6.34e-08	-	-85.52		1.88e-07	-	-93.18		-	3.926e-05	-56.05		5.31e-07	-	-95.04
			6.39e-08	-	-71.22		4.27e-07	-	-92.54		9.66e-07	-	-38.68		9.69e-07	-	-83.69
			6.93e-08	-	-94.47		9.79e-08	-	-94.46		-	-	-10.06		5.58e-07	-	-84.06
			7.37e-08	-	-94.23		4.1e-07	-	-97.42		-	-	-47.28		4.12e-07	-	-87.71
			7.92e-08	-	-83.82		1.33e-07	-	-86.04		-	-	-47.5		4.2e-07	-	-96.38
			8.25e-08	-	-98.45		9.27e-08	-	-98.41		1.17e-06	-	-82.68		5.65e-07	-	-97.72
			8.64e-08	-	-94.69		1.51e-07	-	-96.83		2.21e-06	-	-75.2		3.55e-07	-	-81.97
	h		8.73e-08	-	-97.58		3.95e-07	-	-97.15		4.35e-06	-	-42.14		2.02e-08	-	-96.23
			9.16e-08	-	-96.86		2.12e-07	-	-98.81		-	-	-28.94		1.88e-07	-	-96.5
			9.36e-08	-	-96.43		9.4e-08	-	-99.09		9.38e-07	-	-51.46		2.77e-07	-	-82.22
			9.54e-08	-	-97.28		7.9e-08	-	-97.76		1.95e-06	-	-80.19		5.3e-07	-	-85.36
			9.89e-08	-	-88.69		3.38e-07	-	-97.8		7.41e-06	-	-61.91		8.33e-07	-	-81.43
			1.04e-07	-	-53.15		2.84e-07	-	-72.28		9.26e-06	-	-22.35		8.4e-07	-	-94.24
			1.11e-07	-	-88.47		2.06e-07	-	-88.34		-	-	-14.57		1.26e-07	-	-82.74
			1.12e-07	-	-77.8		4.59e-07	-	-93.9		1.01e-05	-	-58.4		2.12e-07	-	-82.67
			1.13e-07	-	-97.81		1.82e-07	-	-96.54		4.1e-06	-	-52.64		2.29e-08	-	-100.1
			1.15e-07	-	-96.31		4.68e-07	-	-97.24		1.75e-05	-	-41.47		2.64e-07	-	-100.3
			1.15e-07	-	-96.19		1.94e-07	-	-98.71		-	1.767e-05	-83.25		6.86e-07	-	-90.2
			1.18e-07	-	-91.91		4.85e-07	-	-92.4		-	-	-26.13		4.95e-07	-	-85.83
			1.22e-07	-	-97.38		1.56e-07	-	-99.04		-	-	-54.09		3.5e-07	-	-90.96
			1.25e-07	-	-98.81		2.04e-07	-	-98.85		-	1.058e-05	-74.68		4.5e-07	-	-73.1
			1.27e-07	-	-56.53		2.33e-07	-	-86.58		-	-	-17.34		8.06e-07	-	-81.61
			1.31e-07	-	-74.19		4.72e-07	-	-99.24		-	2.323e-05	-62.4		7.52e-07	-	-84.67
			1.35e-07	-	-66.39		1.61e-07	-	-85.79		-	-	3.07		3.65e-07	-	-59.39
			1.42e-07	-	-80.02		2.41e-07	-	-70.89		-	-	-47.06		2.77e-07	-	-100.4
			1.42e-07	-	-40.77		-	-	-25.36		1.74e-06	-	-36.06		6.09e-07	-	-96.17
			1.52e-07	-	-81.66		2.46e-07	-	-93.17		-	-	-31.21		7.27e-07	-	-99.4
			1.54e-07	-	-96.07		6.31e-07	-	-99.08		-	4.02e-05	-56.71		3.32e-07	-	-89.62
			1.58e-07	-	-97.15		3.27e-07	-	-99.97		-	3.647e-05	-57.19		8.52e-07	-	-77.92
			1.61e-07	-	-99.04		4.37e-07	-	-99.01		-	2.059e-05	-71.61		1.5e-07	-	-94.3
			1.63e-07	-	-99.16		2.28e-07	-	-99.42		-	2.64e-05	-68.57		2.6e-07	-	-90.17
			1.65e-07	-	-98.27		2.8e-07	-	-99.29		7.26e-06	-	-71.05		6.17e-07	-	-95.3
	c (1)		1.68e-07	-	-86.01		-	-	-98.41		3.72e-06	-	-68.71		7.37e-09	-	-98.24
			1.8e-07	-	-96.5		8.12e-07	-	-88.74		-	-	-20.03		6.76e-07	-	-87.58
			1.85e-07	-	-98.32		2.06e-07	-	-99.51		-	5.157e-06	-78.1		9.06e-07	-	-96.97
			1.92e-07	-	-83.23		-	3.694e-06	-88.61		8.57e-06	-	-43.02		4.08e-07	-	-79.84
			1.94e-07	-	-96.77		2.55e-07	-	-83.95		-	-	-36.41		1.11e-07	-	-92.9
			2.01e-07	-	-89.12		3.39e-07	-	-92.62		3.41e-06	-	-46.67		8.55e-07	-	-92.32
			2.14e-07	-	-74.77		7.79e-06	-	-74.43		-	-	-29.63		1.84e-07	-	-88.22
			2.23e-07	-	-94.42		8.31e-07	-	-95.58		-	3.043e-05	-60.83		3.55e-08	-	-97.62
			2.37e-07	-	-96.12		2.53e-06	-	-97.51		-	-	-48.48		5.86e-07	-	-81.52
			2.38e-07	-	-88.53		3.14e-07	-	-91.79		4.09e-06	-	-44.83		1.17e-07	-	-96.48
			2.38e-07	-	-38.92		4.71e-08	-	-57.76		-	-	-5.671		4.66e-07	-	-80.7
			2.56e-07	-	-67.41		-	-	-76.09		-	-	-32.32		3.46e-07	-	-88.56
			2.64e-07	-	-97.25		5.14e-07	-	-98.97		7.41e-06	-	-72.93		6.95e-07	-	-97.51
			2.65e-07	-	-98.27		3.13e-07	-	-99.73		2.65e-06	-	-69.08		3.53e-08	-	-99.95
			2.71e-07	-	-82.23		1.34e-06	-	-51.45		-	-	-4.121		9.69e-07	-	-91.63
			2.73e-07	-	-59.9		4.6e-07	-	-98.26		7.04e-06	-	-32.25		8.62e-07	-	-96.95
			2.76e-07	-	-95.89		4.63e-07	-	-91.31		-	-	-15.42		1.16e-07	-	-90.68
			2.88e-07	-	-77.15		4.8e-07	-	-82.82		-	-	-6.137		4.19e-07	-	-63.52
			2.89e-07	-	-97.95		1.39e-06	-	-99.4		-	-	-59.93		3.84e-07	-	-84.3
			2.92e-07	-	-80.77		-	1.318e-05	-92.14		1.01e-05	-	-52.65		7.23e-08	-	-99.41
			2.97e-07	-	-84.72		8.47e-07	-	-85.24		1.08e-05	-	-34.49		2.14e-07	-	-93.02
			3.03e-07	-	-49.87		-	-	-47.22		-	-	-19.08		1.11e-07	-	-89.71
			3.08e-07	-	-99.04		2.23e-07	-	-99.19		1.77e-06	-	-83.38		6.11e-08	-	-89.45
			3.11e-07	-	-98.82		1.28e-06	-	-99.62		-	1.995e-05	-73.52		3.29e-07	-	-94.1
			3.32e-07	-	-95.45		2e-06	-	-97.89		-	-	-38.55		5.59e-07	-	-88.54
			3.32e-07	-	-98.13		6.69e-07	-	-98.97		-	-	-81.08		9.04e-07	-	-94.6
			3.44e-07	-	-88.76		1.54e-06	-	-94.3		-	3.048e-05	-63.66		4.07e-07	-	-90.78
			3.53e-07	-	-95.49		6.17e-07	-	-98.45		-	-	-47.75		3.85e-07	-	-96.74
			3.56e-07	-	-99.41		7.44e-07	-	-99.3		-	-	-50.15		5.52e-07	-	-97.74
			3.6e-07	-	-85.01		5.49e-06	-	-86.01		-	-	-43.82		3.8e-07	-	-79.89
			3.6e-07	-	-87.99		8.18e-07	-	-90.01		6.13e-06	-	-28.03		4.63e-07	-	-98.65
			3.61e-07	-	-86.82		4.6e-07	-	-89.77		-	-	-46.73		5.47e-08	-	-98.18
			3.62e-07	-	-89.43		9.06e-07	-	-82.68		3.73e-06	-	-42.71		8.53e-08	-	-99.31
			3.65e-07	-	-90.17		8.76e-07	-	-92.82		7.1e-06	-	-65.56		7.46e-08	-	-92.05
			3.69e-07	-	-92.86		6.52e-07	-	-99.01		-	1.687e-05	-76.24		2.76e-07	-	-98.25
			3.87e-07	-	-94.77		2.77e-06	-	-98.91		-	3.107e-05	-60.36		4.37e-07	-	-93.31
			3.87e-07	-	-84.75		6.97e-07	-	-89.49		8.9e-06	-	-28.4		9.6e-07	-	-73.35
			3.9e-07	-	-91.01		5.16e-07	-	-91.85		-	4.301e-05	-50.47		3.56e-07	-	-95.01
			3.93e-07	-	-96.85		8.04e-07	-	-98.35		-	1.151e-05	-80.78		2.69e-07	-	-88.57
			4.09e-07	-	-98.27		4.21e-07	-	-99.76		-	1.46e-05	-79.02		7.19e-07	-	-97.93
			4.17e-07	-	-96.88		2.73e-06	-	-96.68		-	-	-27.55		3.3e-07	-	-83.87
			4.2e-07	-	-88.91		4.64e-07	-	-90.92		-	-	-11.58		5.73e-07	-	-87.13
			4.39e-07	-	-89.87		1.02e-06	-	-99.31		-	-	-36.59		5.45e-07	-	-95.25
			4.39e-07	-	-95.97		1.34e-06	-	-100.8		-	3.842e-05	-62.92		7.11e-07	-	-82.87
			4.65e-07	-	-95.64		1.86e-06	-	-98.99		1.14e-05	-	-43.1		5.4e-07	-	-95.75
			4.75e-07	-	-57.34		-	3.871e-06	-53.42		-	-	-14.37		5.22e-07	-	-82.21
			4.84e-07	-	-82.7		3.49e-07	-	-88.28		-	-	-6.118		2.6e-07	-	-80.76
			5.02e-07	-	-98.57		2e-06	-	-98.6		-	3.424e-05	-58.19		3.61e-07	-	-94.61
			5.02e-07	-	-95.69		8.29e-07	-	-99.23		-	-	-56.54		4.84e-07	-	-90.33
			5.17e-07	-	-97.08		6.01e-07	-	-96.92		4.7e-06	-	-70.79		8.43e-07	-	-79.13
			5.18e-07	-	-98.61		9.8e-07	-	-98.81		-	-	-80.62		3.09e-07	-	-97.69
	i		5.24e-07	-	-99.35		1.08e-06	-	-96.2		3.55e-06	-	-32.24		2.11e-08	-	-98.06
			5.29e-07	-	-47.52		-	4.192e-06	-95.08		-	-	-26.04		5.97e-07	-	-71.7
			5.4e-07	-	-97.32		5.47e-07	-	-94.93		-	8.565e-06	-78.92		3.98e-07	-	-85.46
			5.45e-07	-	-97.62		2.65e-06	-	-99.54		-	4.155e-05	-54.22		6.06e-07	-	-86.05
			5.46e-07	-	-92.01		1.9e-06	-	-97		-	-	-39.26		1.07e-07	-	-92.52
			5.5e-07	-	-96.48		6.24e-07	-	-83.03		-	-	-47.13		6.32e-08	-	-100.9
			5.52e-07	-	-94.12		4.48e-06	-	-94.59		-	5.578e-05	-52.8		7.47e-07	-	-93.24
			5.59e-07	-	-40.6		5.97e-07	-	-69.2		-	-	-4.304		5.5e-07	-	-76.35
			5.61e-07	-	-98.41		9.23e-07	-	-100.1		5.55e-06	-	-73.67		6.09e-07	-	-83.16
			5.62e-07	-	-95.81		3.96e-07	-	-97.92		-	1.791e-05	-59.74		8.56e-07	-	-86.29
			5.68e-07	-	-91.27		2.05e-06	-	-99.38		-	-	-41.3		3.82e-07	-	-86.21
			6.02e-07	-	-95.63		2.39e-06	-	-94.2		4.21e-06	-	-34.67		5.33e-07	-	-89.27
			6.07e-07	-	-91.61		2.92e-06	-	-96.11		-	5.896e-05	-54.54		2.3e-07	-	-93.75
			6.11e-07	-	-99.21		1.66e-06	-	-96.52		-	-	-49.45		1.11e-07	-	-91.93
			6.16e-07	-	-72.03		-	1.49e-05	-83.12		8.47e-06	-	-54.85		4.71e-08	-	-97.38
			6.25e-07	-	-94.32		4.91e-07	-	-67.1		-	-	-37.15		2.78e-08	-	-100.2
			6.34e-07	-	-83.41		2.47e-06	-	-94.4		-	-	-24.75		5.71e-07	-	-92.33
			6.82e-07	-	-97.38		1.27e-06	-	-100.2		-	3.456e-05	-56.02		1.37e-08	-	-93.42
			6.94e-07	-	-36.56		3.07e-06	-	-39.16		-	-	-8.597		5.78e-07	-	-64.47
			6.97e-07	-	-62.64		6.05e-06	-	-83.01		-	-	-23.78		4.93e-07	-	-91.08
			7.07e-07	-	-78.9		1.66e-06	-	-80.54		-	-	-22.6		4.41e-07	-	-97.34
			7.16e-07	-	-95.77		1.44e-06	-	-93.98		-	-	-50.01		4.94e-07	-	-91.83
			7.24e-07	-	-96.03		4.32e-07	-	-97.72		1.47e-06	-	-55.77		1.62e-07	-	-99.15
			7.32e-07	-	-99.73		7.78e-07	-	-100.9		-	-	-53.13		8.11e-07	-	-78.27
			7.34e-07	-	-77.78		4.57e-07	-	-93.1		-	-	-18.11		2.69e-07	-	-83.75
			7.4e-07	-	-98.88		1.57e-06	-	-101.1		-	-	-49.55		4e-07	-	-95.42
			7.48e-07	-	-93.98		-	7.552e-06	-96.39		-	-	-43.01		5.98e-07	-	-98.18
			7.76e-07	-	-96.15		1.76e-06	-	-95.48		4.03e-06	-	-34.56		1.28e-07	-	-95.79
			7.95e-07	-	-95.93		3.49e-06	-	-98.21		-	3.818e-05	-55.69		7.42e-07	-	-85.45
			7.98e-07	-	-92.6		7.8e-07	-	-92.8		1.16e-05	-	-51.25		6.33e-07	-	-85.09
			8.01e-07	-	-89.39		-	1.213e-05	-78.79		-	-	-29.94		6.62e-08	-	-99.32
			8.03e-07	-	-99.01		1.45e-06	-	-99		5.07e-06	-	-81.05		4.37e-07	-	-78.21
			8.14e-07	-	-55.5		6.45e-06	-	-82.1		-	-	-18.53		4.17e-07	-	-87.61
			8.14e-07	-	-95.37		2.56e-06	-	-97.57		-	-	-49.09		9.14e-07	-	-86.25
			8.15e-07	-	-97.91		1.71e-06	-	-99.56		-	-	-62.83		7.95e-07	-	-82.46
			8.74e-07	-	-98.32		1.19e-06	-	-99.71		-	1.576e-05	-72.85		5.83e-07	-	-86.41
			8.82e-07	-	-93.47		1.42e-06	-	-94.54		6.82e-06	-	-46.19		7.59e-07	-	-96.56
			8.86e-07	-	-100.2		1.51e-06	-	-100.7		-	-	-48.54		4.81e-07	-	-85.07
			8.88e-07	-	-91.79		1.96e-06	-	-98.42		-	4.159e-05	-52.88		9.31e-07	-	-92.65
			9.13e-07	-	-70.85		1.01e-06	-	-67.6		-	-	-18.83		2.34e-07	-	-95.56
			9.15e-07	-	-74.33		8.07e-06	-	-87.62		4.91e-06	-	-39.89		4.71e-07	-	-98.84
			9.23e-07	-	-93.07		1.03e-06	-	-97.28		-	2.66e-05	-64.78		4.86e-07	-	-87.89
			9.23e-07	-	-85.14		-	9.874e-06	-94.07		8.5e-06	-	-33.97		6.78e-07	-	-96.33
			9.24e-07	-	-98.71		5.82e-06	-	-99.64		-	-	-45.7		9.16e-07	-	-89.77
	a		9.28e-07	-	-89.11		2.09e-06	-	-99.3		-	3.447e-05	-56.14		3.16e-09	-	-100.3
			9.37e-07	-	-94.19		1.02e-06	-	-95.89		-	-	-31.77		4.99e-07	-	-90.24
			9.39e-07	-	-93.16		-	3.07e-06	-98.91		-	-	-55.18		4.65e-07	-	-83.11
			9.41e-07	-	-86.75		1.5e-06	-	-87.88		-	-	-23.91		3.85e-07	-	-91.74
			9.61e-07	-	-96.1		1.59e-06	-	-98.38		-	2.591e-05	-60.45		3.96e-08	-	-95.95
			9.63e-07	-	-88.01		4.31e-06	-	-92.38		-	2.534e-05	-62.37		1.4e-07	-	-90.17
			9.64e-07	-	-82.9		2.79e-06	-	-96.19		-	-	-30.05		2.29e-08	-	-95.86
			9.71e-07	-	-94.5		1.03e-06	-	-97.44		-	3.807e-05	-55.99		2.86e-07	-	-95.1
			9.83e-07	-	-94.06		-	7.885e-06	-97.5		-	-	-38.05		7.12e-07	-	-91.01
			9.84e-07	-	-88.24		-	6.828e-06	-95.21		-	3.447e-05	-59.19		7.11e-08	-	-92.61
			1e-06	-	-91.74		4.4e-06	-	-97.81		-	-	-48.15		6.53e-07	-	-87.44
			1.02e-06	-	-77.39		1.23e-06	-	-85.76		2.38e-06	-	-63.02		1.58e-07	-	-97.39
			1.02e-06	-	-93.03		3.76e-06	-	-95.47		-	-	-50.99		6.82e-07	-	-89.61
			1.04e-06	-	-95.24		1.22e-06	-	-98.05		-	2.098e-05	-74.96		4.95e-07	-	-80.26
			1.06e-06	-	-87.61		8.44e-07	-	-93.84		2.7e-06	-	-22.61		4.06e-07	-	-97.7
			1.07e-06	-	-82.47		1.43e-06	-	-87.75		-	-	-23.57		6.69e-08	-	-96.22
			1.08e-06	-	-67.68		3.65e-06	-	-92.31		1.15e-05	-	-45.71		3.05e-08	-	-96.95
			1.08e-06	-	-96.69		1.89e-06	-	-99.05		-	-	-53.59		4.34e-07	-	-84.36
			1.08e-06	-	-87.87		7.92e-07	-	-92.04		1.24e-05	-	-66.63		5.08e-07	-	-96.55
			1.09e-06	-	-95.58		1.03e-06	-	-97.4		-	1.496e-05	-80.79		1.27e-07	-	-93.81
			1.09e-06	-	-94.55		2.73e-06	-	-98.89		-	-	-32.51		9.57e-07	-	-85.33
			1.1e-06	-	-95.28		4.97e-06	-	-93.94		-	4.727e-05	-56.8		4.58e-07	-	-95.22
			1.1e-06	-	-98.35		4.05e-06	-	-98.87		-	-	-58.91		8.96e-07	-	-88.64
			1.12e-06	-	-82.65		1.17e-06	-	-91.45		3.22e-06	-	-45.64		4.21e-07	-	-83.9
			1.12e-06	-	-88.04		-	7.939e-06	-97.3		-	-	-41.95		8.8e-07	-	-99.44
			1.13e-06	-	-96.84		2.46e-06	-	-98		-	4.08e-05	-50.8		4.62e-08	-	-99.8
			1.13e-06	-	-90.47		4.62e-06	-	-97.37		-	3.155e-05	-61.13		1.46e-07	-	-91.37
			1.13e-06	-	-81.94		-	4.661e-06	-86.09		-	-	-14.29		6.14e-07	-	-89.21
			1.14e-06	-	-97.58		2.31e-06	-	-97.88		-	3.216e-05	-56.09		5.83e-08	-	-93.58
			1.14e-06	-	-84.93		6.64e-07	-	-98.14		4.79e-06	-	-68.99		2.5e-07	-	-90.15
			1.14e-06	-	-94.79		1.11e-06	-	-98.95		-	-	1.027		2.7e-07	-	-86.19
			1.14e-06	-	-87.64		2.46e-06	-	-89.61		-	-	-20.25		6.4e-07	-	-88.85
			1.16e-06	-	-66.41		-	-	-51.22		-	-	-15.87		4.49e-08	-	-95.93
			1.16e-06	-	-91.21		4.07e-06	-	-97.12		-	-	-44.01		6.14e-07	-	-85.26
			1.17e-06	-	-85.6		4.27e-06	-	-94		-	3.438e-05	-55.59		8.83e-08	-	-91.95
			1.17e-06	-	-92.75		-	4.232e-06	-98.79		-	4.242e-05	-53.1		6.64e-07	-	-91.8
			1.18e-06	-	-97.12		5.56e-07	-	-96.68		-	-	-24.66		9.55e-07	-	-67.46
			1.18e-06	-	-43.57		-	-	-33.51		-	-	-25.64		9.62e-07	-	-67.82
			1.19e-06	-	-66.85		1.33e-06	-	-67.74		-	-	-26.07		1.51e-07	-	-90.34
			1.19e-06	-	-99.66		1.32e-06	-	-99.83		-	3.121e-05	-58.19		3.87e-07	-	-87.18
			1.19e-06	-	-98.14		2.11e-06	-	-96.27		-	1.74e-05	-76.65		9.27e-07	-	-88.07
			1.2e-06	-	-85.28		7.02e-06	-	-93.32		1.09e-05	-	-34.83		9.63e-07	-	-82.05
			1.22e-06	-	-86.16		2.43e-06	-	-88.59		-	-	-16.42		2.48e-07	-	-94.19
			1.22e-06	-	-96.36		1.9e-06	-	-100.5		-	-	-38.63		5.31e-07	-	-81.56
			1.23e-06	-	-86.67		1.1e-06	-	-70.52		-	-	-44.83		1.22e-07	-	-99.62
			1.23e-06	-	-97.89		3.25e-06	-	-100		-	-	-55.05		5.22e-07	-	-87.22
			1.24e-06	-	-97.84		-	-	-		-	3.765e-05	-60.22		8.48e-07	-	-98.82
			1.26e-06	-	-80.4		2.34e-06	-	-96.65		-	3.415e-05	-59.6		6.35e-08	-	-97.71
			1.26e-06	-	-96.58		2.87e-06	-	-97.38		1.69e-05	-	-42.8		6.77e-07	-	-97.19
			1.28e-06	-	-87.62		4.07e-06	-	-94.59		-	3.406e-05	-62.65		1.19e-07	-	-97.64
			1.3e-06	-	-81.35		2.35e-06	-	-92.9		-	-	-40.99		2.71e-08	-	-99.16
			1.3e-06	-	-93.53		1.98e-06	-	-98.09		-	-	-45.08		5.37e-07	-	-93.55
			1.31e-06	-	-79.8		2.52e-06	-	-44.2		-	-	-38.31		7.07e-08	-	-100.8
			1.31e-06	-	-97.34		-	2.61e-06	-90.14		-	-	-36.52		4.93e-07	-	-82.88
			1.31e-06	-	-94.02		-	8.844e-06	-97.37		-	4.406e-05	-54.53		6.93e-07	-	-98.25
			1.32e-06	-	-77.74		1.27e-06	-	-89.21		-	-	-25.3		5.19e-07	-	-98.22
			1.33e-06	-	-96.65		3.4e-06	-	-99.4		-	-	-46.83		8.1e-07	-	-85.79
			1.33e-06	-	-76.12		1.61e-06	-	-92.7		-	-	-27.77		9.79e-07	-	-65.96
			1.34e-06	-	-87		-	5.996e-06	-97.22		9.93e-06	-	-45.57		3.71e-07	-	-92.11
			1.34e-06	-	-89.12		2.05e-06	-	-87.77		-	-	-28.65		5.22e-07	-	-90.36
			1.35e-06	-	-85.57		9.67e-08	-	-77.96		-	-	-24.07		3.04e-07	-	-80.92
			1.36e-06	-	-96.93		2.07e-06	-	-99.03		-	-	-18.27		6.71e-07	-	-94.2
			1.37e-06	-	-85.2		1.44e-06	-	-85.98		-	-	-46.9		7.66e-08	-	-95.64
			1.37e-06	-	-92.88		2.95e-06	-	-95.3		-	-	-31.29		9.74e-08	-	-96.45
			1.37e-06	-	-94.06		-	8.206e-06	-98.68		-	5.538e-05	-51.58		6.87e-07	-	-100.2
			1.39e-06	-	-54.9		2.25e-06	-	-49.47		-	-	-15.21		2.87e-07	-	-93.27
			1.39e-06	-	-85.17		-	8.3e-06	-94.02		-	-	-32.34		2.96e-07	-	-94.29
			1.4e-06	-	-69.42		2.47e-06	-	-74.12		-	3.26e-05	-61.33		5.96e-07	-	-77.09
			1.41e-06	-	-87.76		4.89e-06	-	-96.63		-	3.432e-05	-55.19		4.71e-07	-	-95.53
			1.42e-06	-	-78.91		4.91e-06	-	-90.2		-	-	-16.03		5.42e-07	-	-92.2
			1.43e-06	-	-94.88		-	6.188e-06	-96.59		-	-	-49.98		4.05e-07	-	-97.67
			1.45e-06	-	-86.87		6.77e-06	-	-91.45		6.78e-06	-	-28.14		7.39e-08	-	-96.23
			1.45e-06	-	-81.67		-	6.085e-06	-64.49		-	-	-22.44		5.59e-07	-	-89.51
			1.46e-06	-	-92.72		9.37e-06	-	-92.23		-	-	-29.17		4.32e-08	-	-97.84
			1.47e-06	-	-93.33		2.01e-06	-	-98.01		-	-	-21.9		-	8.973e-07	-89.01
			1.49e-06	-	-87.62		1.05e-06	-	-51.31		-	-	-17.15		7.42e-08	-	-90.3
			1.5e-06	-	-95.85		-	2.888e-06	-97.43		4.82e-06	-	-46.36		6.97e-08	-	-97.49
			1.53e-06	-	-66.37		2.6e-06	-	-88.08		-	-	-23.19		2.09e-07	-	-90.56
			1.53e-06	-	-97.31		2.46e-06	-	-98.04		-	2.469e-05	-66.76		9.15e-07	-	-79.25
			1.54e-06	-	-86.91		-	6.193e-06	-99.07		-	-	-31.13		5.89e-07	-	-98
			1.55e-06	-	-90.51		-	1.185e-05	-98.58		-	-	-33.23		7.79e-07	-	-98.51
			1.57e-06	-	-99.83		3.93e-06	-	-99.74		-	2.674e-05	-73.12		8.95e-08	-	-89.38
			1.57e-06	-	-98.01		2.39e-06	-	-98.53		-	5.04e-05	-53.75		2.38e-07	-	-89
			1.57e-06	-	-93.16		1.02e-05	-	-97.2		-	-	-48.11		5.25e-07	-	-93.47
			1.58e-06	-	-94.49		3.49e-06	-	-98.54		-	-	-34.89		9.44e-07	-	-84.21
			1.59e-06	-	-92.59		5.44e-06	-	-92.87		-	-	-24.68		7.11e-07	-	-80.62
			1.59e-06	-	-85.14		7.45e-06	-	-99.02		-	-	-47.74		8.96e-07	-	-90.34
			1.61e-06	-	-93.76		2.49e-06	-	-96.97		-	2.545e-05	-77.88		6.14e-07	-	-82.01
			1.68e-06	-	-92.43		-	6.46e-06	-94.6		-	4.209e-05	-56.24		5.84e-07	-	-97.57
			1.69e-06	-	-98.68		2.51e-06	-	-99.32		-	2.295e-05	-71.51		6.13e-07	-	-94.04
	b		1.7e-06	-	-85.27		2.02e-06	-	-93.77		-	3.074e-05	-65.74		4.82e-09	-	-97.67
			1.7e-06	-	-85.91		5.42e-06	-	-97.44		-	3.122e-05	-59.7		3.93e-07	-	-82.84
			1.72e-06	-	-86.29		2.98e-06	-	-95.76		6.68e-06	-	-34.88		7.74e-07	-	-88.84
			1.73e-06	-	-90.59		-	6.583e-06	-97.31		-	3.165e-05	-58.79		7.12e-07	-	-92.51
			1.74e-06	-	-81.45		-	1.425e-05	-80.83		-	-	-32.86		3.44e-07	-	-96.29
			1.74e-06	-	-96.8		3.4e-06	-	-91.61		-	-	-27.5		5.6e-07	-	-97.96
			1.76e-06	-	-97.4		2.93e-06	-	-97.34		-	-	-47.66		6.04e-07	-	-100.2
			1.77e-06	-	-91.48		1.49e-06	-	-93.51		-	-	-8.684		2.73e-07	-	-74.74
			1.77e-06	-	-89.98		-	1.033e-05	-99.34		-	-	-48.35		5.68e-07	-	-95.7
			1.78e-06	-	-74.64		7.34e-06	-	-89.45		-	-	-36.27		7.11e-07	-	-98.54
			1.79e-06	-	-87.05		4.78e-06	-	-79.13		-	-	-28.85		8.03e-08	-	-99.29
			1.79e-06	-	-97.63		2.13e-06	-	-97.74		1.18e-05	-	-53.34		4.8e-07	-	-76.67
			1.79e-06	-	-93.96		-	1.231e-05	-78.13		-	-	-35.69		5.05e-07	-	-97.53
			1.81e-06	-	-44.52		2.96e-06	-	-46.42		-	-	-19.05		2.17e-07	-	-93.03
			1.84e-06	-	-74.1		5.55e-06	-	-57.76		-	-	-12.46		5.56e-08	-	-79.14
			1.86e-06	-	-94.58		3.18e-06	-	-97.85		-	-	-20.52		4.13e-07	-	-93.2
			1.86e-06	-	-81.36		2.52e-06	-	-93.52		-	-	-48.04		8.99e-07	-	-97.6
			1.89e-06	-	-92.29		3.13e-06	-	-94.4		2.92e-06	-	-53.48		1.21e-07	-	-95.01
			1.97e-06	-	-97.35		6.59e-07	-	-98.4		-	-	-36.07		7.55e-07	-	-97.66
			2.02e-06	-	-86.46		2.29e-06	-	-90.73		1.53e-06	-	-36.01		6.89e-07	-	-77.87
			2.04e-06	-	-94.32		2.44e-06	-	-94.39		1.29e-05	-	-38.02		7.95e-07	-	-83.22
			2.07e-06	-	-92.55		7.23e-06	-	-97.24		-	3.522e-05	-56.88		5.78e-07	-	-85.95
			2.08e-06	-	-90.54		2.99e-06	-	-94.42		-	-	-0.4096		6.79e-07	-	-91.88
			2.14e-06	-	-98.29		6.99e-06	-	-88.21		-	2.697e-05	-57.47		6.4e-08	-	-92.67
			2.14e-06	-	-87.54		-	9.515e-06	-91.84		1.12e-05	-	-44.56		5.66e-07	-	-93.9
			2.14e-06	-	-94.23		2.58e-06	-	-95.65		-	2.412e-05	-74.62		7.32e-07	-	-91.42
			2.15e-06	-	-90.04		4.18e-06	-	-98.33		-	3.46e-05	-63.79		2.35e-07	-	-92.44
			2.15e-06	-	-97.44		4.27e-06	-	-99.55		-	-	-37.92		7.59e-07	-	-82.91
			2.16e-06	-	-65.2		3.1e-06	-	-67.43		2.14e-06	-	-15.77		7.09e-07	-	-88.56
			2.19e-06	-	-82.46		-	9.801e-06	-68.98		-	-	-44.47		5.18e-07	-	-94.84
			2.2e-06	-	-98.28		3.9e-06	-	-99.62		-	-	-56.46		8.41e-07	-	-90.67
			2.23e-06	-	-78.05		4.26e-06	-	-95.61		-	-	-57.07		4.17e-07	-	-87.63
			2.27e-06	-	-71.16		1.67e-06	-	-48.1		-	-	-21.38		7.14e-07	-	-74.81
			2.31e-06	-	-88.52		2.3e-06	-	-94.21		-	-	-33.88		4.42e-07	-	-90.29
			2.31e-06	-	-89.64		1.84e-06	-	-97.1		7.13e-06	-	-45.49		8.02e-07	-	-81.83
			2.32e-06	-	-93.58		9.65e-06	-	-92.18		-	-	-31.27		9.36e-07	-	-84.68
			2.36e-06	-	-93.48		1.48e-06	-	-99.83		9.09e-06	-	-50.6		8.02e-07	-	-98.84
			2.38e-06	-	-78.45		2.97e-06	-	-79.76		-	-	-16.42		9.67e-07	-	-90.16
			2.39e-06	-	-96.28		2.62e-06	-	-91.3		5.58e-06	-	-48.42		4.95e-07	-	-97.62
			2.41e-06	-	-90.6		1.94e-06	-	-96.24		9.14e-06	-	-31.27		6.57e-08	-	-93.59
			2.41e-06	-	-96.53		4.27e-06	-	-98.37		-	-	-33.29		2.73e-07	-	-98.67
			2.42e-06	-	-88.88		-	1.178e-05	-94.74		-	-	-24.86		3.84e-07	-	-96.52
			2.44e-06	-	-83.34		3.6e-06	-	-89.34		-	-	-47.48		1.51e-07	-	-91.11
	k		2.45e-06	-	-94.48		2.9e-06	-	-99.47		1.05e-05	-	-46.08		2.24e-08	-	-92.55
			2.45e-06	-	-94.36		3.38e-06	-	-95.5		-	4.159e-05	-54.4		7.43e-07	-	-85.04
			2.46e-06	-	-97.46		1.94e-06	-	-98.26		-	-	-42.87		7.03e-07	-	-88.16
			2.47e-06	-	-89.71		4.98e-06	-	-91.13		-	5.53e-05	-50.26		2.58e-07	-	-94.7
			2.47e-06	-	-84.24		-	2.028e-05	-81.63		-	-	-18.38		8.71e-07	-	-94.7
			2.47e-06	-	-94.01		5.34e-06	-	-99.13		-	-	-34.2		9.52e-07	-	-93.65
			2.48e-06	-	-94.6		-	9.166e-06	-86.54		-	-	-27.99		4.35e-07	-	-98.27
			2.51e-06	-	-90.68		8.64e-06	-	-98.54		-	-	-49.56		7.48e-07	-	-96.42
			2.52e-06	-	-96.93		6.56e-06	-	-96.44		-	-	-43.07		5.16e-07	-	-91.46
			2.54e-06	-	-99.25		1.19e-06	-	-99.08		6.14e-06	-	-75.61		6.82e-08	-	-94.9
			2.56e-06	-	-84.91		9.52e-06	-	-84.99		-	-	-52.8		8.1e-07	-	-87.11
			2.57e-06	-	-76.94		2.81e-06	-	-53.07		-	-	-7.652		9.06e-07	-	-94.15
			2.59e-06	-	-93.92		2.95e-07	-	-97.52		-	3.212e-05	-54.21		2.36e-08	-	-95.61
	f		2.61e-06	-	-95.56		3.52e-06	-	-96.34		-	-	-57.04		1.04e-08	-	-93.78
			2.66e-06	-	-93.07		-	6.286e-06	-100.5		-	-	-33.43		4.07e-07	-	-98.55
			2.67e-06	-	-94.08		1.05e-06	-	-98.69		-	-	-37.04		9.87e-07	-	-93.65
			2.7e-06	-	-95.97		1.46e-06	-	-96.46		-	-	-55.29		6.82e-07	-	-89.1
			2.73e-06	-	-91.14		1.71e-06	-	-90.3		-	-	-21.89		2.85e-07	-	-94.22
			2.74e-06	-	-96.9		4.75e-06	-	-99.04		-	2.17e-05	-75.81		3.53e-07	-	-84.64
			2.75e-06	-	-94.09		-	1.081e-05	-100.4		-	-	-31.72		7.09e-07	-	-96.94
			2.77e-06	-	-97.77		4.48e-06	-	-96.88		-	-	-23.88		3.82e-07	-	-100.3
			2.77e-06	-	-91.1		8.6e-06	-	-96.89		-	-	-47.41		8.08e-07	-	-93.25
			2.78e-06	-	-96.36		7.66e-06	-	-99.43		-	-	-29.47		7.94e-07	-	-89.35
			2.79e-06	-	-80.06		5.2e-06	-	-89.08		-	6.018e-05	-51.44		4e-07	-	-80.89
			2.84e-06	-	-95.14		1.89e-06	-	-96.72		3.06e-06	-	-34.43		6.71e-07	-	-79.83
			2.86e-06	-	-89.1		8.05e-06	-	-83.68		-	-	-24.54		1.07e-07	-	-94.2
			2.9e-06	-	-94.7		2.26e-06	-	-97.72		-	4.011e-05	-56.63		8.8e-07	-	-87.98
			2.92e-06	-	-93.64		9.98e-07	-	-89.3		9.08e-06	-	-61.87		9.21e-08	-	-90.14
			2.92e-06	-	-85.97		8.47e-06	-	-81.91		-	5.757e-05	-50.06		3.46e-07	-	-96.6
			2.92e-06	-	-96.37		6.43e-06	-	-96.62		-	3.929e-05	-59.39		4.31e-07	-	-89.35
			2.92e-06	-	-93.88		-	1.018e-05	-92.86		-	-	-35.85		6.78e-07	-	-95.28
			2.96e-06	-	-61.85		-	2.554e-05	-62.9		-	-	-2.692		6.37e-07	-	-82.69
			2.98e-06	-	-97.46		6.76e-06	-	-98.81		-	-	-45.41		1.73e-07	-	-90.15
			2.98e-06	-	-81.98		-	1.59e-05	-89.87		-	2.098e-05	-66.41		9.41e-07	-	-95.08
			3e-06	-	-85.94		4.95e-06	-	-93.16		3.45e-06	-	-33.56		1.78e-07	-	-94.39
			3.16e-06	-	-92.65		1.86e-06	-	-98.51		-	2.946e-05	-62.8		1.34e-07	-	-83.91
			3.39e-06	-	-91.03		7.01e-06	-	-95.64		-	-	-30.94		8.35e-07	-	-96.54
			3.4e-06	-	-97.16		7.26e-06	-	-97.78		-	-	-46.43		1.71e-07	-	-92
			3.4e-06	-	-82.12		9.56e-06	-	-98.35		-	-	-8.765		5.32e-07	-	-87.69
			3.41e-06	-	-84.57		1.03e-05	-	-95.93		-	-	-48.79		5.22e-08	-	-98.9
			3.5e-06	-	-93.54		4.16e-06	-	-93.63		-	-	-39.51		9.83e-07	-	-93.35
			3.51e-06	-	-93.78		6.14e-06	-	-99.23		-	-	-27.8		9.91e-07	-	-95.42
			3.54e-06	-	-88.76		-	1.014e-05	-98.67		-	-	-34.78		8.55e-07	-	-94.27
			3.64e-06	-	-87.77		1.37e-06	-	-98.66		-	2.407e-05	-60.82		1.76e-07	-	-95.58
			3.67e-06	-	-77.58		3.09e-06	-	-94.62		-	-	-38.06		3.64e-07	-	-93.61
			3.79e-06	-	-97.53		3.31e-06	-	-98.12		-	2.818e-05	-62.78		1.5e-07	-	-89.65
			3.79e-06	-	-67.86		7.37e-06	-	-91.78		-	-	-15.8		5.1e-07	-	-99.36
			3.81e-06	-	-46.1		-	-	-31.55		-	-	-18.99		9.63e-07	-	-89.12
			3.9e-06	-	-83.18		9.6e-06	-	-90.63		-	-	-36.39		2.9e-07	-	-101.7
			4e-06	-	-94.63		3.89e-06	-	-94.64		-	2.909e-05	-70.63		9.04e-07	-	-100.7
			4.04e-06	-	-73.88		6.36e-06	-	-97.1		-	-	-18.33		1.67e-07	-	-92.47
			4.08e-06	-	-93.53		5.96e-06	-	-97.67		-	-	-59.63		4.11e-07	-	-88.19
			4.11e-06	-	-79.45		2.25e-06	-	-99.85		-	-	-52.57		2.93e-07	-	-93.32
			4.12e-06	-	-98.32		6.84e-06	-	-97		1.34e-05	-	-68.65		1.04e-07	-	-90.38
			4.15e-06	-	-94.41		7.08e-06	-	-94.43		-	-	-36.3		8.14e-07	-	-79.28
			4.2e-06	-	-95.11		6.69e-06	-	-97.05		-	3.283e-05	-56.81		4.21e-07	-	-91.45
			4.28e-06	-	-94.85		1.09e-05	-	-80.6		-	-	-14.45		2.13e-07	-	-92.22
			4.31e-06	-	-96.01		7.31e-06	-	-95.71		-	-	-44.72		3.69e-07	-	-89.67
			4.31e-06	-	-97.01		-	1.271e-05	-85.9		-	-	-32.46		4.41e-07	-	-99.51
			4.37e-06	-	-94.17		1.81e-06	-	-96.69		1.6e-05	-	-34.6		2.1e-07	-	-85.21
			4.44e-06	-	-75.21		5.78e-06	-	-85.25		-	-	-14.84		1.26e-07	-	-93.34
			4.46e-06	-	-93.13		4.78e-06	-	-95.27		-	-	-27.68		3.09e-07	-	-96.02
			4.7e-06	-	-90.23		4.22e-06	-	-95.73		-	-	-59.15		5.86e-07	-	-92.05
			4.74e-06	-	-95.03		8.65e-06	-	-96.48		-	-	-31.44		3.63e-07	-	-91.55
			4.76e-06	-	-95.99		8.02e-06	-	-80.52		-	-	-31.13		7.44e-07	-	-90.98
			4.79e-06	-	-33.33		-	2.429e-05	-51.94		-	-	-30.11		2.61e-07	-	-88.75
			4.83e-06	-	-89.93		6.27e-06	-	-85.15		-	-	-16.11		8.69e-07	-	-97.41
			4.91e-06	-	-79.08		-	9.626e-06	-86.29		-	-	-30.19		6.22e-07	-	-89.34
			4.91e-06	-	-99.37		8.05e-06	-	-84.25		-	-	-42.04		6.91e-07	-	-93.43
			4.94e-06	-	-92.6		4.87e-06	-	-98.04		-	-	-45		1.87e-07	-	-94.29
			4.95e-06	-	-95.84		7.72e-06	-	-97.18		-	4.073e-05	-54.54		4.62e-07	-	-92.89
			5.02e-06	-	-94.99		1.03e-05	-	-90.07		1.66e-05	-	-42.89		7.45e-07	-	-95.86
			5.04e-06	-	-94.29		8.24e-06	-	-97.93		-	-	-32.63		9.33e-07	-	-98.02
			5.08e-06	-	-91.25		9.92e-06	-	-90.56		-	-	-32.31		6.29e-08	-	-94.94
			5.27e-06	-	-82.66		-	3.872e-05	-50.92		5.4e-06	-	-34.74		9.9e-07	-	-95.28
			5.3e-06	-	-91.62		6.54e-06	-	-93.94		-	-	-45.84		6.39e-07	-	-91.96
			5.38e-06	-	-96.07		4.44e-06	-	-93.87		-	-	-39.08		8.2e-07	-	-95.5
			5.4e-06	-	-78.63		1.06e-05	-	-96.38		-	-	-15.02		2.06e-07	-	-89.99
			5.43e-06	-	-95.16		6.5e-06	-	-81.41		-	-	-39.1		1.13e-07	-	-94.82
			5.43e-06	-	-97.84		2.26e-06	-	-97.74		-	-	-49.32		1.62e-07	-	-92.77
			5.44e-06	-	-97.81		6.88e-06	-	-97.88		-	-	-42.62		7.52e-07	-	-89.54
			5.49e-06	-	-95.72		-	1.492e-05	-93.04		-	-	-39.54		8.08e-07	-	-95.55
			5.5e-06	-	-83.66		1.81e-06	-	-99.02		-	-	-49.83		8.01e-07	-	-93.03
			5.51e-06	-	-95.12		2.65e-06	-	-98.22		8.76e-06	-	-59.81		6.16e-07	-	-89.43
			5.63e-06	-	-82.2		2.6e-06	-	-85.78		-	-	-15.03		7.6e-08	-	-84.99
			5.67e-06	-	-85.65		-	9.837e-06	-80.13		-	-	-21.18		2.83e-07	-	-95.13
			5.71e-06	-	-95.63		5.06e-06	-	-94.24		-	-	-31.77		6.75e-07	-	-87
			5.83e-06	-	-96.28		-	1.179e-05	-93.95		-	-	-5.865		4.99e-07	-	-101.5
			5.86e-06	-	-76.88		-	2.002e-05	-78.26		-	-	-9.148		4e-07	-	-75.92
			5.91e-06	-	-81.78		-	-	-71.54		-	-	-20.61		3.21e-07	-	-90.68
			6.24e-06	-	-83.93		1.6e-06	-	-95.62		-	-	-18.86		8.84e-07	-	-93.81
			6.25e-06	-	-97.43		5.11e-06	-	-98.17		-	-	-33.83		1.18e-07	-	-91.49
			6.26e-06	-	-95.58		1.18e-05	-	-94.67		-	-	-27.05		7.2e-08	-	-94.31
			6.35e-06	-	-97.95		1e-05	-	-98.53		-	-	-54.91		8.55e-07	-	-96.87
			6.36e-06	-	-95.16		9.31e-06	-	-98.09		-	-	-21.76		5.4e-07	-	-87.07
			6.38e-06	-	-97.59		-	1.262e-05	-95.44		-	-	-43.42		6e-07	-	-94.7
			6.8e-06	-	-65.18		-	1.429e-05	-85.59		-	-	-17.03		2.76e-07	-	-91.51
			6.97e-06	-	-96.65		-	8.699e-06	-98.63		-	-	-45.11		4.27e-08	-	-93.05
			7.06e-06	-	-91.02		-	2.022e-05	-74.02		1.37e-05	-	-34.4		9.21e-07	-	-90.03
			7.17e-06	-	-95.22		5.58e-06	-	-96.01		-	-	-55.31		2.52e-07	-	-92.85
			7.29e-06	-	-84.94		6.27e-06	-	-90.49		-	-	-22.72		2.43e-07	-	-90.69
			7.62e-06	-	-81.52		5.84e-06	-	-89.32		-	-	-14.97		5.12e-07	-	-86.48
			7.82e-06	-	-85.88		7.54e-06	-	-92.9		-	-	-25.7		7.88e-07	-	-86.57
			7.97e-06	-	-98.05		9.39e-06	-	-92.2		-	-	-46.17		3.55e-07	-	-92.2
			8.15e-06	-	-96.56		2.94e-06	-	-97.23		-	-	-36.99		6.18e-07	-	-91.79
			8.24e-06	-	-86.38		7.1e-06	-	-94.13		-	-	-25.57		4.95e-07	-	-85.59
			8.39e-06	-	-79.4		-	2.243e-05	-78.89		-	-	-22.39		6.35e-07	-	-82.72
			8.66e-06	-	-97		-	1.725e-05	-91.74		-	-	-22.08		2.36e-07	-	-98.62
			8.76e-06	-	-91.65		1.08e-05	-	-93.52		-	-	-28.9		7.6e-07	-	-96.04
			8.96e-06	-	-94.14		1.05e-05	-	-94.73		-	-	-31.48		6.33e-07	-	-95.67
			9.17e-06	-	-78.9		-	1.691e-05	-83.34		-	-	-19.91		5.09e-08	-	-99.05
			9.37e-06	-	-81.27		1.47e-06	-	-97.29		-	-	7.303		7.02e-07	-	-79.34
			9.4e-06	-	-94.62		-	2.214e-05	-84.24		-	-	-31.1		2.34e-07	-	-93.52
			9.47e-06	-	-94.61		-	1.904e-05	-87.83		-	-	-36		8.07e-08	-	-95.24
			9.55e-06	-	-96.58		1.58e-06	-	-96.78		8.38e-06	-	-80.11		9.54e-07	-	-85.43
			9.81e-06	-	-91.41		-	1.88e-05	-86.07		-	-	-7.751		1.95e-07	-	-98.44
			9.91e-06	-	-88.69		-	3.266e-05	-62.35		-	-	-22.72		7.76e-07	-	-97.32
			1.04e-05	-	-81.58		8.67e-06	-	-63.82		-	-	-29.85		4.02e-07	-	-88.86
			1.1e-05	-	-80.35		-	3.186e-05	-64.98		-	-	-18.47		5.65e-07	-	-98.31
			1.1e-05	-	-93.25		-	2.137e-05	-76.62		-	-	-31.41		6.96e-07	-	-94.49
			1.12e-05	-	-96.03		-	-	-76.96		-	-	-58.13		2.6e-07	-	-88.92
			1.2e-05	-	-83.77		8.28e-06	-	-95.5		-	-	-39		3.28e-07	-	-94.66
			1.2e-05	-	-98.16		-	-	-		-	2.798e-05	-69.34		-	2.01e-05	-70.27
			1.21e-05	-	-96.35		8.49e-06	-	-98.78		-	-	-43.93		4.64e-07	-	-89.3
			1.21e-05	-	-81.11		-	1.119e-05	-96.24		-	-	-33.03		9.04e-07	-	-85.49
			1.4e-05	-	-74.45		1.04e-05	-	-88.35		-	-	-31.34		9.18e-07	-	-76.93
			1.71e-05	-	-83.06		-	-	-35.03		-	-	-11.92		3.67e-07	-	-95.96
			-	1.086e-06	-98.72		-	-	-101		-	-	-57.03		4.32e-07	-	-84.72
			-	1.186e-05	-95.95		-	2.103e-05	-93.74		-	4.494e-05	-52.5		1.26e-07	-	-93.97
			-	1.288e-05	-90.58		-	3.326e-05	-63.31		-	-	-25.74		4.58e-07	-	-98.57
			-	1.369e-05	-91.91		-	2.357e-05	-85.09		-	-	-30.28		8.97e-08	-	-94.48
			-	1.41e-05	-75.76		1.19e-05	-	-74.03		4.37e-06	-	-38.98		5.51e-07	-	-94.41
			-	1.499e-05	-76.98		-	2.558e-05	-68.44		-	-	-24.44		7.75e-07	-	-94.49
			-	1.764e-05	-95.47		-	2.363e-05	-86.82		-	-	-5.96		2.61e-07	-	-89.41
			-	1.772e-05	-86.83		-	-	-44.89		-	-	0.4917		2.41e-07	-	-91.08
			-	2.419e-05	-66.97		-	4.073e-05	-56.31		-	-	-19.12		1.61e-07	-	-96.82
			-	2.457e-05	-82.06		2.75e-06	-	-96.02		-	-	-16.18		4.91e-07	-	-81
			-	2.553e-05	-64.49		-	3.284e-05	-60.25		-	-	-22.1		4.68e-07	-	-96.15
			-	2.677e-05	-61.39		-	1.575e-05	-78.36		-	-	-44.76		4.34e-08	-	-92.33
			-	2.694e-05	-70.7		-	-	-53.22		-	-	-21.78		2.43e-07	-	-84.24
			-	2.763e-05	-64.97		-	4.113e-05	-56.86		-	-	-21.44		3.22e-07	-	-100.4
			-	2.803e-05	-67.31		-	4.035e-05	-51.78		6.24e-06	-	-16.52		5.24e-07	-	-95.72
			-	3.012e-05	-65.72		-	2.257e-05	-70.46		-	-	-0.6869		1.82e-07	-	-98.95
			-	3.702e-05	-59.44		-	-	-66.41		-	-	-43.94		9.83e-07	-	-93.99
			-	3.828e-05	-55.3		9.8e-06	-	-58.62		-	-	-6.172		3.09e-07	-	-89.2
			-	3.971e-05	-53.58		1.85e-06	-	-96.2		4.79e-06	-	-36.36		7.09e-08	-	-88.27
			-	5.095e-05	-51.58		-	-	-47.85		-	-	-13.5		2.37e-07	-	-98.12
	d		-	-	-24.71		-	-	-10.45		3.46e-06	-	-29.97		8.33e-09	-	-101.7
			-	-	108.8		-	1.297e-05	-72.54		-	1.537e-05	-65.89		8.66e-09	-	-91.73
	g		-	-	-22.59		7.95e-07	-	-76.81		-	-	-4.585		1.85e-08	-	-92.84
	j		-	-	-54.33		-	1.766e-05	-95.1		-	-	-32.21		2.06e-08	-	-95.81
	l (2)		-	-	-65.06		-	-	-68.56		-	-	-34.42		2.45e-08	-	-93.94
			-	-	-4.724		-	-	-0.8235		-	-	-17.95		2.93e-08	-	-98.58
			-	-	-3.072		-	-	-20.25		-	-	0.919		3.5e-08	-	-90.4
			-	-	16.81		-	9.607e-06	-71		5.7e-06	-	-43.07		3.52e-08	-	-93.22
			-	-	26.85		1.42e-06	-	-95.7		1.8e-06	-	-50.86		6.18e-08	-	-94.39
			-	-	18.43		5.29e-07	-	-49.09		4.84e-07	-	-27.69		6.29e-08	-	-92.52
			-	-	-30.76		-	-	-55.5		-	3.385e-05	-56.68		6.45e-08	-	-100.4
			-	-	-11.28		-	-	-20.14		-	-	-10.37		7.18e-08	-	-81.47
			-	-	-45.86		-	-	-44.03		-	-	-21.09		9.14e-08	-	-87.99
			-	-	-71.9		-	-	-52.65		-	4.33e-05	-54.09		1.03e-07	-	-103.4
			-	-	-25.31		4.64e-06	-	-88.65		-	1.656e-05	-63.8		1.04e-07	-	-93.24
			-	-	15.14		-	-	-7.941		-	-	10.51		1.18e-07	-	-78.45
			-	-	-13.2		-	-	-32.92		-	-	-8.531		1.23e-07	-	-79.65
			-	-	-54.64		-	1.427e-05	-93.79		-	4.545e-05	-50.08		1.23e-07	-	-97.13
			-	-	-23.94		-	-	-42.99		4.16e-06	-	-41.37		1.42e-07	-	-95.87
			-	-	-81.86		-	-	-63.98		-	-	-13.61		1.49e-07	-	-90.07
			-	-	-43.83		-	-	-57.49		-	-	-7.207		1.49e-07	-	-92.96
			-	-	-4.764		-	-	-8.769		-	-	-15.28		1.53e-07	-	-86.58
			-	-	-68.66		1.16e-05	-	-73.57		-	-	-3.018		1.55e-07	-	-96.17
			-	-	-50.19		-	-	-69.36		-	-	-4.489		1.88e-07	-	-90.66
			-	-	-53.65		-	1.008e-05	-96.1		-	4.558e-05	-52.3		1.98e-07	-	-96.76
			-	-	3.029		-	-	-14.54		-	-	-6.926		2e-07	-	-81.03
			-	-	301.2		-	-	78.73		-	-	-16.02		2.06e-07	-	-88.57
			-	-	-66.65		-	-	-66.27		-	-	-15.46		2.08e-07	-	-86.59
			-	-	-36.35		-	-	-24.62		-	-	-1.486		2.23e-07	-	-88.99
			-	-	-5.083		2.88e-07	-	-52.25		-	-	-11.75		2.35e-07	-	-71.4
			-	-	-11.17		-	-	-31.81		-	-	7.797		2.35e-07	-	-88.4
			-	-	191		-	-	8.062		-	-	-1.346		2.36e-07	-	-88.84
			-	-	-5.845		-	1.51e-05	-67.57		-	-	-9.35		2.44e-07	-	-79.49
			-	-	148.2		-	4.364e-06	-70.39		5.9e-06	-	-35.42		2.47e-07	-	-97.42
			-	-	15.82		-	-	24.15		4.51e-06	-	-41.39		2.71e-07	-	-96.64
			-	-	63.91		6.61e-07	-	-78.12		4.77e-06	-	-36.44		2.72e-07	-	-83.49
			-	-	-44.87		-	1.308e-05	-75.09		-	-	-26.64		2.78e-07	-	-94.75
			-	-	-2.187		-	-	-29.64		-	-	-30.06		2.78e-07	-	-92.95
			-	-	-60.28		1.74e-06	-	-94.77		5.18e-06	-	-48.33		3.04e-07	-	-89.6
			-	-	189.2		-	-	60.17		-	-	-17.36		3.18e-07	-	-85.21
			-	-	122		-	-	54.98		-	-	-6.621		3.27e-07	-	-85.4
			-	-	-7.309		-	-	26.51		-	-	-8.22		3.94e-07	-	-96.05
			-	-	-29.24		-	-	-49.39		-	-	-27.78		4.03e-07	-	-97.29
			-	-	8.161		-	-	10.4		-	-	-0.7703		4.3e-07	-	-97.27
			-	-	-32.82		9.19e-06	-	-91.35		6.19e-06	-	-37.49		4.34e-07	-	-84.14
			-	-	-27.21		-	-	-0.5009		-	-	-17.12		4.42e-07	-	-97.41
			-	-	-55.37		-	3.112e-05	-64.37		-	-	-39.3		4.62e-07	-	-98.36
			-	-	-10.67		-	-	-18.25		-	-	-7.859		4.72e-07	-	-75.54
			-	-	-7.775		-	-	-42.52		-	-	-22.92		4.86e-07	-	-75.17
			-	-	-16.77		-	-	-39.22		-	-	-15.22		4.96e-07	-	-91.77
			-	-	-27.27		-	-	7.539		-	-	-8.751		5.02e-07	-	-82.77
			-	-	-1.4		-	-	-7.933		-	-	-2.392		5.19e-07	-	-97.36
			-	-	-39.94		-	2.355e-05	-68.33		-	-	-27.93		5.23e-07	-	-97.27
			-	-	-63.2		-	-	-47.94		-	-	-23.2		5.46e-07	-	-95.1
			-	-	-23.22		-	-	-24.22		-	-	-7.682		5.56e-07	-	-96.7
			-	-	56.21		2.05e-06	-	-80.37		-	-	-10.76		5.72e-07	-	-94.75
			-	-	-15		-	-	-28.95		-	-	-17.34		6.07e-07	-	-77.36
			-	-	3.18		-	-	-13.15		-	-	-3.653		6.22e-07	-	-83.34
			-	-	-34.72		-	-	-43.38		-	-	-26.25		6.25e-07	-	-75.25
			-	-	-86.94		-	-	-58.75		-	-	-23.86		6.27e-07	-	-95.5
			-	-	-35.36		7.04e-07	-	-61.18		-	-	-24.39		6.34e-07	-	-81.74
			-	-	-89.43		1.74e-06	-	-87.09		-	-	-28.09		6.51e-07	-	-71.89
			-	-	51.45		-	-	-29.55		-	-	-29.24		6.54e-07	-	-89.11
			-	-	-49.23		-	-	-43.27		-	-	-19.24		6.59e-07	-	-93.94
			-	-	-2.214		-	-	-57.59		-	-	13.1		6.77e-07	-	-61.23
			-	-	-61.97		8.76e-06	-	-86.14		-	3.859e-05	-53.59		7.01e-07	-	-93.5
			-	-	-93.4		4.13e-06	-	-89.14		-	-	-37.5		7.14e-07	-	-89.39
			-	-	-13.36		-	-	-25.08		-	-	-5.531		7.37e-07	-	-87.1
			-	-	55.98		-	-	2.489		-	-	-19.21		7.46e-07	-	-64.13
			-	-	3.204		-	-	5.071		-	-	-9.159		7.49e-07	-	-95.37
			-	-	-10.45		-	-	-13.34		-	-	-9.511		7.58e-07	-	-79.83
			-	-	4.86		-	8.117e-06	-78.43		2.29e-06	-	-39.73		7.96e-07	-	-87.82
			-	-	-13.24		-	3.395e-05	-56.47		-	-	-19.29		8.07e-07	-	-84.69
			-	-	160.3		-	-	13.43		-	-	-24.21		8.44e-07	-	-74.17
			-	-	-25.56		-	-	-58.17		-	-	-1.614		8.73e-07	-	-72.08
			-	-	-17.37		-	-	-36.88		-	-	3.923		8.95e-07	-	-81.58
			-	-	-33.79		-	1.487e-05	-82.2		-	-	-38.33		9.23e-07	-	-97.45
			-	-	38.23		-	-	-69.93		-	-	-29		9.24e-07	-	-95.28
			-	-	97.2		2.45e-06	-	-61.82		7.71e-06	-	-41.34		9.62e-07	-	-88.77
			-	-	19.3		-	-	-54.28		-	-	-14.16		9.65e-07	-	-88.33
			-	-	-9		-	-	40.28		-	-	-39.78		9.87e-07	-	-94.41
